# Supplementary material
Source: publisher figshare collection journal article supplement (https://gsapubs.figshare.com/ndownloader/files/23313215)
Supplement: Supplementary file 1 [file 23313215]

# Appendix 1. Chronology of selected 27 June flow events and actions taken by Federal, State, and County agencies and stakeholders, June 2014 to April 2015.

| Date        | Agency    | Action/Comment                                                                                                                                                                                                                                                                                            |
|-------------|-----------|-----------------------------------------------------------------------------------------------------------------------------------------------------------------------------------------------------------------------------------------------------------------------------------------------------------|
| <b>2014</b> |           |                                                                                                                                                                                                                                                                                                           |
| 27 Jun      | HVO       | New fissures form on Pu‘u ‘Ō‘ō, new flows move NE.                                                                                                                                                                                                                                                        |
| 10 Jul      | HVO       | New flow forms from different section of June 27th fissure.                                                                                                                                                                                                                                               |
| 13 Jul      | HVO       | Flow travels 2.2 km from Pu‘u ‘Ō‘ō.                                                                                                                                                                                                                                                                       |
| 6 Aug       | HVO       | Flow reaches forest boundary, 7 km from Pu‘u ‘Ō‘ō.                                                                                                                                                                                                                                                        |
| 7 Aug       |           | Hurricane Iselle makes landfall on the Island of Hawai‘i.                                                                                                                                                                                                                                                 |
| 18 Aug      | HVO       | Flow enters crack system on East Rift Zone, 10 km from Pu‘u ‘Ō‘ō.                                                                                                                                                                                                                                         |
| 20 Aug      | HCCD, HVO | Briefing at HCCD, including Hawai‘i County mayor and various stakeholders, on flow status and potential flow scenarios.                                                                                                                                                                                   |
| 22 Aug      | HVO       | News release, Kīlauea lava flow northeast of Pu‘u ‘Ō‘ō potential concern; increase helicopter overflights to 3x per week.                                                                                                                                                                                 |
| 24 Aug      | HCOM      | Sponsors first of 28 public meetings with residents of Kaohe Homesteads at Community Center in Pāhoa.                                                                                                                                                                                                     |
| 26 Aug      | HCCD      | Begins daily overflights (except for weather and maintenance) for situational awareness, GPS coordinates of flow front provided to HVO.                                                                                                                                                                   |
| 28 Aug      | HCCD      | Begins daily public-radio message of flow status and response activities.                                                                                                                                                                                                                                 |
| 3 Sep       | HCCD      | Begins door to door notification of potential hazard to residents in Kaohe Homesteads.                                                                                                                                                                                                                    |
| 4 Sep       | HVO       | Volcano Activity Notice (VAN): ground based alert level raised from WATCH to WARNING, flow could reach Kaohe Homesteads boundary within 5-7 days; aviation color code remains at ORANGE.                                                                                                                  |
| 4 Sep       | HCOM; HG  | Hawai‘i County mayor signs emergency proclamation, which allows county authorities to restrict access to Kaohe Homestead to residents (Hawaii Tribune-Herald, 4 September 2014).<br><br>Hawaii Governor signs emergency proclamation, which allows re-establishing or improving roads for public transit. |
| 5 Sep       | HDOH      | Advises residents to plan for smoke exposure from burning vegetation, low levels of sulfur dioxide gas (Wakida, C., 5 September 2014).                                                                                                                                                                    |
| 6 Sep       | HVO       | Flow travels north from the crack system along steepest-descent path, 1.2 km west of Kaohe Homesteads.                                                                                                                                                                                                    |
| 8 Sep       | HVO       | Likely flow path identified from Favalli and other (2005) analysis, leads directly into Pāhoa, which the flow follows within two days.                                                                                                                                                                    |
| 11 Sep      | HCDPW     | Work begins to widen and level Government Beach Road along the coast and the abandoned section of Railroad Avenue to provide alternate transit routes to the Puna District if June 27th flow covers Highway 130 (Callis, T., 12 September 2014).                                                          |
|             | HVO       | Flow follows steepest-descent path leading into Pāhoa.                                                                                                                                                                                                                                                    |

|        |                 |                                                                                                                                                                                                                                                                                                                                                          |
|--------|-----------------|----------------------------------------------------------------------------------------------------------------------------------------------------------------------------------------------------------------------------------------------------------------------------------------------------------------------------------------------------------|
| 12 Sep | DLNR            | Closes Wao Kele O Puna Forest Reserve (Department of Land and Natural Resources, 12 September 2014).                                                                                                                                                                                                                                                     |
| 13 Sep | News Media      | Reports real estate offices receiving rush of inquiries from residents in lower Puna District about available housing rentals near Hilo (Stewart, C.M., 13 September 2014).                                                                                                                                                                              |
| 15 Sep | News Media      | Pahoa Preschool, operated by Kamehameha Schools, closes temporarily (Stewart, C.M., 24 September 2014).<br><br>Hawaii Property Insurance Association places moratorium on new insurance policies in lower Puna District (Callis, T., 20 September 2014).                                                                                                 |
| 15 Sep | HCCD            | Establishes remote Incident Command Center and Information Resource Center at Community Center in Pāhoa, the latter open to public 8 am to 4 pm Monday through Friday (Big Island Video News, 16 September 2014).                                                                                                                                        |
| 17 Sep | HCDPW           | Hawai‘i County and state election workers prepare for possible road burials by flow for the 4 November election (Callis, T., 17 September 2014a).<br><br>Construction to be delayed for roundabout at intersection of Pahoa Village Road and Highway 130, a \$4.8 million project that was slated to begin in October. (Callis, T., 17 September 2014b). |
|        | HCDPW           | Delays construction of Pahoa District Park, the “biggest recreational project in the history of Hawai‘i County” because equipment is needed for alternate road construction; County Environmental Management director looks for temporary site for the waste-and-recycle transfer station in Pāhoa (Corrigan, D., 16 September 2014).                    |
| 19 Sep | HVO             | Flow front stalls for first time, breakouts active upslope.                                                                                                                                                                                                                                                                                              |
| 20 Sep | HCFD            | First brushfire caused by June 27th flow, contained by HCFD by 22 September.                                                                                                                                                                                                                                                                             |
| 23 Sep | HCDPW           | Work begins on Kalapana side of buried Highway 130 and Chain of Craters Road; surveying alignment of original road path ongoing (Callis, T., 22 September 2014).                                                                                                                                                                                         |
| 23 Sep | Media           | Montessori Country School in Pāhoa closes after 31 years in operation (Stewart, C.M., 24 September 2014).                                                                                                                                                                                                                                                |
| 25 Sep | HDOE            | Announces contingency plans to build 17 temporary classrooms for as many as 500 students and staff who may not be able to reach their schools if Highway 130 is covered by the June 27th flow; initial estimated cost is \$9 million (Hawaii State Department of Education, 25 September 2014a).                                                         |
| 30 Sep | HCOM, HCCD, HVO | Begin daily multi-agency media briefings (telephone bridge), attended by HCCD administrator and HVO scientist.                                                                                                                                                                                                                                           |
| 1 Oct  | HCDPW           | Work is completed on Government Beach Road and Railroad Avenue, and work continues on Kalapana side of Highway 130 and Chain of Craters road (Lincoln, M., 1 October 2014).                                                                                                                                                                              |

|        |           |                                                                                                                                                                                                          |
|--------|-----------|----------------------------------------------------------------------------------------------------------------------------------------------------------------------------------------------------------|
|        | NPS       | NPS approves single lane, unpaved road to restore Chain of Craters as alternate route within Park.                                                                                                       |
|        | HVO       | Breakout advances past the stalled flow front.                                                                                                                                                           |
| 7 Oct  | HCFD      | Firefighters extinguish 300-acre brush fire, started by lava flow (Tribune Herald).                                                                                                                      |
|        | FAA       | FAA establishes TFR in airspace above the leading edge of flow in response to increased air traffic.                                                                                                     |
| 11 Oct | NPS       | NPS submits request to DOI to restore Chain of Craters alternate route to original 22-foot easement, allowing for two lanes instead of one (Callis, T., 11 October 2014).                                |
| 14 Oct | HCG       | Places moratorium on new rental leases in lower Puna for residents seeking new government housing assistance (reported Oct 30 by Stephens Media Hawaii via Tribune Herald).                              |
| 16 Oct | HVO       | Flow front stalls, weakly active with little to no advance through 21 Oct.                                                                                                                               |
| 18 Oct | NWS       | Tropical Storm Ana passes south of Island of Hawai'i, forecasted earlier to hit the island as a hurricane (Hawaii Tribune-Herald, 16 October 2014).                                                      |
| 22 Oct | HVO       | Breakout advances past stagnated flow front, enters narrow gully, increases advance rate to about 300 m/day.                                                                                             |
| 23 Oct | HCCD      | Cemetery Road and Apa'a Street near solid waste Transfer Station are closed to the public (Hawaii Tribune-Herald, 23 October 2014).<br><br>Begins 24-hour watch of activity in Pāhoa.                    |
| 24 Oct | HG        | Requests Federal assistance to support local emergency protective measures in response to the flow (Hawaii Tribune Herald, 24 October 2014).                                                             |
|        | HCCD      | Begins providing video clips to media through contract.                                                                                                                                                  |
|        | NPS       | Work begins in Hawai'i Volcanoes National Park on 2-lane emergency access route to connect Chain of Craters Road to Highway 130 (Hawaii Volcanoes National Park, 21 October 2014).                       |
| 25 Oct | HCCD/ HVO | Flow crosses Cemetery Road, 3:50 am HST, advancing about 250 m/day.                                                                                                                                      |
|        | HCCD      | Door to door notification of flow status and issuing evacuation notices to residents downslope of flow south of Apa'a Street between Cemetery Road and Pahoa Village Road, but no evacuation is ordered. |
| 26 Oct | HVO       | Begins 24-hour observation and mapping of lava flow in Pāhoa, which ended on 1 November.                                                                                                                 |
| 27 Oct | HDOE      | Announces implementation of contingency plans to begin in two                                                                                                                                            |

|             |          |                                                                                                                                                                   |
|-------------|----------|-------------------------------------------------------------------------------------------------------------------------------------------------------------------|
|             |          | days, affecting about 1,700 students and 300 employees at school complexes in Kea‘au and Pāhoa (Hawaii State Department of Education, 27 October 2014b).          |
| 30 Oct      | HVO      | Flow front stalls 150 m from Pahoa Village Road, breakouts active upslope.                                                                                        |
|             | HCCD     | Hawaii Army and Air National Guard members (>80) deployed in Puna District to assist police (Burnett, J., 30 October 2014).                                       |
| 4 Nov       | POTUS    | Signs a Disaster Declaration for Public Assistance (FEMA-4201-DR-HI).                                                                                             |
| 5 Nov       | HCDPW    | Rough grade completed of emergency route, connecting Highway 130 to Chain of Craters Road (Big Island News Video, 6 November 2014).                               |
| 7 Nov       | FEMA     | FEMA coordinates and releases first Joint Incident Action Plan (IAP) with County, State, and Federal agencies.                                                    |
| 10 Nov      | HCCD     | House burned and buried by lava, only residence destroyed by June 27th flow.                                                                                      |
| 14 Nov      | HVO      | Large breakout near Pu‘u ‘Ō‘ō, within three days the June 27th flow becomes inactive below crack system and near Pāhoa.                                           |
| 18 Nov      | HVO      | Most distant breakout 12 km from Pu‘u ‘Ō‘ō forms new lobe atop flow that entered Pāhoa in October.                                                                |
| 3 Dec       | HVO      | New lobe travels north of the first lobe, moving through forest several hundred meters per day                                                                    |
| 8 Dec       | HCCD     | Organizes first of several field trips for displaced students to the lava flow at Pahoa transfer station (Hawaii State Department of Education, 8 December 2014). |
| 11 Dec      | HVO      | Flow is following steepest-descent path that intersects Pahoa Village Road and Highway 130, 3 km downslope.                                                       |
| 16 Dec      | HVO      | Issues VAN, with flow moving average of 285 m/day between 9-16 December, flow could reach Pahoa Village Marketplace (1.5 km downslope) in 5 days.                 |
| 18 Dec      |          | Many businesses in Pahoa Village Marketplace begin shutdown and removal of equipment and materials.                                                               |
| 23-30 Dec   | HVO      | Flow advance slows to between 0 to <40 m/day.                                                                                                                     |
| 30 Dec      | HVO      | Reports flow front stalled 530 m from marketplace, breakouts active upslope.                                                                                      |
| <b>2015</b> |          |                                                                                                                                                                   |
| 1 Jan       | HVO      | Reduces overflights to about one per week and conducts at least weekly ground-based field work near flow front.                                                   |
| 22 Jan      | HCOM     | Last public community meeting in Pāhoa.                                                                                                                           |
| 23 Jan      | USGS VSC | Launches "USGS Volcanoes" Facebook page.                                                                                                                          |
| 1-7 Mar     | HVO      | Surface flows noticeably diminish in vigor following largest deflationary tilt at Kīlauea's summit during June 27th flow activity.                                |
| 13 Mar      | HVO      | Surface flows near Kaohe Homesteads and Pahoa Marketplace inactive, breakouts upslope <8 km from Pu‘u ‘Ō‘ō .                                                      |

|             |      |                                                                                                                                                             |
|-------------|------|-------------------------------------------------------------------------------------------------------------------------------------------------------------|
| 18 Mar      |      | Malama Market reopens at Pahoa Marketplace.                                                                                                                 |
| 25 Mar      | HVO  | Issues Volcano Activity Notice: ground based alert level lowered from WARNING to WATCH, no flows active more than 6 km from Pu‘u ‘Ō‘ō.                      |
| 27 Mar      | FEMA | Announces closure of incident time period (FEMA-4201-DR-HI) to be 25 March 2015.                                                                            |
| 27 Apr      | HDOE | Announces plans will be developed for next school year to reopen Keonepoko Elementary School and return students and teachers to pre-flow school complexes. |
| <b>2016</b> |      |                                                                                                                                                             |
| 8 Jun       | HVO  | June 27th flow inactive following new Pu‘u ‘Ō‘ō vent opening on 24 May.                                                                                     |
| 25 July     | HVO  | 61g lava flow crosses Emergency route, enters the ocean next day.                                                                                           |

Agency acronyms: FAA (Federal Aviation Administration); FEMA (Federal Emergency Management Agency); DLNR (Department of Land and Natural Resources); HCG (Hawai‘i County government); HCCD (Hawai‘i County Civil Defense); HCDPW (Hawai‘i County Department of Public Works); HCFD (Hawai‘i County Fire Department); HCOM (Hawai‘i County Office of Mayor); HDOE (Hawaii State Department of Education); HDOT (Hawaii Department of Transportation); HG (Hawaii Governor); HVO (Hawaiian Volcano Observatory); NWS (National Weather Service).

## REFERENCES

- Big Island Video News, 2014, Incident Command Center Opens in Pahoa: 16 September 2014: <http://www.bigislandvideonews.com/2014/09/16/video-incident-command-center-opens-pahoa/> (accessed November 2017).
- Big Island News Video, 2014, Chain of Craters road update: Rough grade complete: 6 November 2014: <http://www.bigislandvideonews.com/2014/11/06/chain-craters-road-update-rough-grade-complete/> (accessed November 2017).
- Burnett, J., 2014, National Guard, police mobilize in Puna, 30 October 2014: Hawaii Tribune-Herald: <http://hawaiitribune-herald.com/news/local-news/national-guard-police-mobilize-puna> (accessed November 2014).
- Callis, T., 2014, County begins work on alternate routes; lava flow moves to northeast: 12 September 2014: Hawaii Tribune-Herald: <http://hawaiitribune-herald.com/news/local-news/county-begins-work-alternate-routes-lava-flow-moves-northeast> (accessed November 2017).

- Callis, T., 2014a, Election officials prep for lava: 17 September 2014: Hawaii Tribune-Herald: <http://hawaiitribune-herald.com/news/local-news/election-officials-prep-lava> (accessed November 2017).
- Callis, T., 2014b, County working to find temp site for transfer station: 17 September 2014: Hawaii Tribune-Herald: <http://hawaiitribune-herald.com/news/local-news/county-working-find-temp-site-transfer-station> (accessed November 2017).
- Callis, T., 2014, Insurer halts new policies in lower Puna: 20 September 2014: Hawaii Tribune-Herald: <http://hawaiitribune-herald.com/news/local-news/insurer-halts-new-policies-lower-puna> (accessed November 2017).
- Callis, T., 2014, Park gives support for two-lane alternate route: 11 October 2017: Hawaii Tribune-Herald: <http://hawaiitribune-herald.com/news/local-news/park-gives-support-two-lane-alternate-route> (accessed November 2017).
- Corrigan, D., 2014, Puna park dreams waylaid for escape roads: 16 September 2014: Big Island Video News: <http://www.bigislandvideonews.com/2014/09/16/video-puna-park-dreams-waylaid-escape-roads/> (accessed November 2017).
- Department of Land and Natural Resources, 2014, OHA close Wao Kele O Puna Forest Reserve due to lava danger: DLNR News Release: 12 September 2014: <http://dlnr.hawaii.gov/blog/2014/09/12/nr14-113/> (accessed November 2017).
- Favalli, M., Pareschi, M.T., Neri, A., and Isola, I., 2005, Forecasting lava flow paths by a stochastic approach: Geophysical Research Letters, v. 32, no. 3, L03305, doi: 10.1029/2004GL021718.
- Hawaii State Department of Education, 2014a, Department of Education announces contingency plans for lava flow: Hawaii State Department of Education Press Release: 25 September 2014: <http://www.hawaiipublicschools.org/ConnectWithUs/MediaRoom/PressReleases/Pages/DOE-readies-Keaau-and-Pahoa-area-schools-for-lava-flow.aspx> (accessed November 2017).
- Hawaii State Department of Education, 2014b, Department of Education announces contingency plans for lava flow: Hawaii State Department of Education Press Release: 27 October 2014: <http://www.hawaiipublicschools.org/ConnectWithUs/MediaRoom/PressReleases/Pages/lava-update-102714.aspx> (accessed November 2017).
- Hawaii State Department of Education, 2014, Public school students view new Kilauea lava: DOE Press Release: 8 December 2014:

- <http://www.hawaiipublicschools.org/ConnectWithUs/MediaRoom/PressReleases/Pages/1-ava-field-trip.aspx> (accessed November 2017).
- Hawaii Tribune-Herald, 2014, Kenoi declares state of emergency as lava continues to advance, 4 September 2014: Hawaii Tribune-Herald: <http://hawaiitribune-herald.com/news/kenoi-declares-state-emergency-lava-continues-advance> (accessed November 2017).
- Hawaii Tribune-Herald, 2014, Ana will hit island as tropical storm, forecasters say: 16 October 2014: <http://hawaiitribune-herald.com/news/local-news/ana-will-hit-island-tropical-storm-forecasters-say> (accessed November 2017).
- Hawaii Tribune-Herald, 2014, Civil Defense keeping 24-hour watch as lava flows nears Pahoehoe: 23 October 2014: <http://hawaiitribune-herald.com/news/local-news/update-civil-defense-keeping-24-hour-watch-lava-flow-nears-pahoehoe> (accessed November 2017).
- Hawaii Volcanoes National Park, 2014, “End of the Road” will close during emergency route construction: 21 October 2014: National Park Service News Release: <https://www.nps.gov/havo/learn/news/closure.htm> (accessed November 2017).
- Lincoln, M., 2014, Hawaii Island Mayor pushes for 2-lane Puna lava flow evacuation route through Volcanoes National Park: 1 October 2014: Hawaii News Now: <http://www.hawaiinewsnow.com/story/26673137/hawaii-island-mayor-pushes-for-2-lane-puna-lava-flow-evacuation-route-through-volcanoes-national-park> (accessed November 2017).
- Stewart, C.M., 2014, Lava threat boosts demand for rental housing near Hilo: 13 September 2014: Hawaii Tribune-Herald: <http://hawaiitribune-herald.com/news/local-news/lava-threat-boosts-demand-rental-housing-near-hilo> (accessed November 2017).
- Stewart, C.M., 2014, Two Pahoehoe schools close because of lava: 24 September 2014: Hawaii Tribune-Herald: <http://hawaiitribune-herald.com/news/local-news/two-pahoehoe-schools-close-because-lava> (accessed November 2017).
- Wakida, C., 2014, Smoke contains mixture of gases, fine particles that could trigger respiratory conditions: 5 September 2014: KITV News: <http://www.kitv.com/news/hawaii-health-officials-warn-about-smoke-from-lava-flow/27907090> (accessed September 2014).

APPENDIX 2. Selected list of outreach activities of the U.S. Geological Survey's Hawaiian Volcano Observatory in 2014-2015.

| Volcano Awareness Month, public presentations, January 2014                    |                                         |                                                                                                      |
|--------------------------------------------------------------------------------|-----------------------------------------|------------------------------------------------------------------------------------------------------|
| Date                                                                           | Location                                | Title                                                                                                |
| 7-Jan                                                                          | HVNP                                    | Kīlauea Volcano's East Rift Zone: 31 years and still erupting                                        |
| 8-Jan                                                                          | OVE                                     | Mauna Loa: How Well Do You Know the Volcano in Your Backyard?                                        |
| 9-Jan                                                                          | UH                                      | Human footprints tell of tragedy in 1790 ... or do they?                                             |
| 14-Jan                                                                         | HVNP                                    | Happenings in Halema‘uma‘u: An update on Kīlauea’s summit eruption                                   |
| 16-Jan                                                                         | UH                                      | What is a fissure eruption and how does it work?                                                     |
| 21-Jan                                                                         | HVNP                                    | What is a fissure eruption and how does it work?                                                     |
| 22-Jan                                                                         | Kona                                    | From Ka‘ū to North Kona: Stories of lava flows and volcanic landscapes                               |
| 28-Jan                                                                         | HVNP                                    | Decades of degassing: Wake up and smell the coughing!                                                |
| 4-Feb                                                                          | HVNP                                    | What we don’t know about Hawaiian volcanoes                                                          |
| Other public presentations in 2014                                             |                                         |                                                                                                      |
| Date                                                                           | Location                                | Title                                                                                                |
| 22-Feb                                                                         | Hilo                                    | Eruptive History and Current Status of Mauna Loa                                                     |
| 24-Feb                                                                         | HCCD                                    | Kīlauea Lava Flow Update                                                                             |
| 28-Feb                                                                         | PTA                                     | Mauna Loa                                                                                            |
| 3-Mar                                                                          | HVNP                                    | Eruptive history and current status of Mauna Loa                                                     |
| 4-Mar                                                                          | HVNP                                    | Hualālai and Mauna Loa Lava Flows                                                                    |
| 11-Mar                                                                         | Kona                                    | Hualālai and Mauna Loa Lava Flows                                                                    |
| 2-Apr                                                                          | OVE                                     | Hualālai and Mauna Loa Lava Flows                                                                    |
| 4-Apr                                                                          | MVS                                     | Kīlauea Volcano’s Active Lava Flow Update                                                            |
| 3-May                                                                          | Hilo                                    | Astro Day (Interactive displays at community event)                                                  |
| 13-May                                                                         | HVNP                                    | Kīlauea Volcano’s 1924 Explosive Eruption                                                            |
| 24-Jun                                                                         | Volcano                                 | Hawaii State Civil Defense Training Workshop                                                         |
| 2-Jul                                                                          | Hilo                                    | Current Status of Mauna Loa                                                                          |
| Community meetings about June 27th flow organized by Mayor's Office, 2014-2015 |                                         |                                                                                                      |
| Month                                                                          | Date                                    |                                                                                                      |
| Aug                                                                            | 24, 25, 26, 27                          |                                                                                                      |
| Sep                                                                            | 2, 4, 9, 11, 17, 18, 22, 23, 25, 29, 30 |                                                                                                      |
| Oct                                                                            | 2, 9, 16, 23, 30                        |                                                                                                      |
| Nov                                                                            | 6, 13, 20                               |                                                                                                      |
| Dec                                                                            | 4, 11, 18                               |                                                                                                      |
| Jan                                                                            | 8, 22                                   |                                                                                                      |
| Other community presentations and briefings                                    |                                         |                                                                                                      |
| Date                                                                           | Location                                | Title                                                                                                |
| 30-Aug                                                                         | Kea‘au                                  | Puna Regional Emergency Fair                                                                         |
| 13-Sep                                                                         | Pāhoa                                   | Lava Flow Information Fair                                                                           |
| 23-Sep                                                                         | Pāhoa                                   | Kīlauea eruption updates and Mauna Loa status, Hawaii Electric Light Company (HELCO) management team |



| 24-Sep                                                                                                                                                                                                                                                               | Pāhoa                                                                      | June 27th flow update, Hawaii State Department of Education, Deputy Superintendent and administrators<br><br>June 27th flow update, Pahoa Elementary School students and families |
|----------------------------------------------------------------------------------------------------------------------------------------------------------------------------------------------------------------------------------------------------------------------|----------------------------------------------------------------------------|-----------------------------------------------------------------------------------------------------------------------------------------------------------------------------------|
| 10-Oct                                                                                                                                                                                                                                                               | Hilo                                                                       | June 27th flow update, Congressional briefing                                                                                                                                     |
| 15-Dec                                                                                                                                                                                                                                                               | Pāhoa                                                                      | HCCD-sponsored briefing with Pahoa Marketplace business managers and workers                                                                                                      |
| 6-Jan                                                                                                                                                                                                                                                                | Pāhoa                                                                      | HCCD-sponsored briefing with businesses                                                                                                                                           |
| 28-Jan                                                                                                                                                                                                                                                               | Maku‘u Market                                                              | June 27th flow update for families residing in the Maku‘u Farm Lots, Department of Hawaiian Home Lands, Maku‘u Farmer's Association                                               |
| <b>Volcano Watch articles relating to the June 27th flow, August 2014 - March 2015;<br/><a href="http://hvo.wr.usgs.gov/volcanowatch">http://hvo.wr.usgs.gov/volcanowatch</a> (update URL when new Web site is launched &amp; add URL's to each article listed )</b> |                                                                            |                                                                                                                                                                                   |
| Date                                                                                                                                                                                                                                                                 | Title                                                                      |                                                                                                                                                                                   |
| 28-Aug                                                                                                                                                                                                                                                               | June 27th lava flow activity continues, so stay informed!                  |                                                                                                                                                                                   |
| 4-Sep                                                                                                                                                                                                                                                                | HVO scientists are closely watching Kīlauea—and Mauna Loa                  |                                                                                                                                                                                   |
| 11-Sep                                                                                                                                                                                                                                                               | The June 27th flow advances toward Pāhoa                                   |                                                                                                                                                                                   |
| 18-Sep                                                                                                                                                                                                                                                               | HVO and Hawai‘i County Civil Defense jointly track the June 27th lava flow |                                                                                                                                                                                   |
| 25-Sep                                                                                                                                                                                                                                                               | Why do lava flows stop advancing?                                          |                                                                                                                                                                                   |
| 2-Oct                                                                                                                                                                                                                                                                | Emergency preparedness in Hawai‘i encompasses multiple hazards             |                                                                                                                                                                                   |
| 9-Oct                                                                                                                                                                                                                                                                | The current state of activity in Kīlauea Volcano's lower East Rift Zone    |                                                                                                                                                                                   |
| 23-Oct                                                                                                                                                                                                                                                               | Pāhoehoe lava makes for fitful advance of the June 27th lava flow          |                                                                                                                                                                                   |
| 30-Oct                                                                                                                                                                                                                                                               | The June 27th lava flow slows, surges into Pāhoa, then slows again         |                                                                                                                                                                                   |
| 6-Nov                                                                                                                                                                                                                                                                | How long will Kīlauea Volcano's June 27th flow last?                       |                                                                                                                                                                                   |
| 13-Nov                                                                                                                                                                                                                                                               | Coming up for air in lower Puna                                            |                                                                                                                                                                                   |
| 20-Nov                                                                                                                                                                                                                                                               | HVO looks ahead while there's a break(out) in the activity                 |                                                                                                                                                                                   |
| 26-Nov                                                                                                                                                                                                                                                               | Kīlauea is a moody volcano                                                 |                                                                                                                                                                                   |
| 11-Dec                                                                                                                                                                                                                                                               | Revisiting Kalapana amidst the current flow activity                       |                                                                                                                                                                                   |
| 18-Dec                                                                                                                                                                                                                                                               | HVO ushers in the New Year with "Volcano Awareness Month"                  |                                                                                                                                                                                   |
| 25-Dec                                                                                                                                                                                                                                                               | What does it take to successfully divert a lava flow?                      |                                                                                                                                                                                   |
| 1-Jan                                                                                                                                                                                                                                                                | Plumbing the depths of Pu‘u‘ Ō‘ō                                           |                                                                                                                                                                                   |
| 8-Jan                                                                                                                                                                                                                                                                | Communicating information during a lava flow crisis                        |                                                                                                                                                                                   |
| 15-Jan                                                                                                                                                                                                                                                               | Satellites are now an essential tool for tracking lava flows               |                                                                                                                                                                                   |
| 22-Jan                                                                                                                                                                                                                                                               | Monitoring lava flows with boots on the ground and eyes in the sky         |                                                                                                                                                                                   |
| 5-Feb                                                                                                                                                                                                                                                                | The June 27th lava flow: It's more than just a flow front                  |                                                                                                                                                                                   |
| 26-Feb                                                                                                                                                                                                                                                               | Ten Years at the top: HVO's Scientist-in-Charge steps aside                |                                                                                                                                                                                   |
| 5-Mar                                                                                                                                                                                                                                                                | HVO welcomes its new Scientist-in-Charge: Christina Neal                   |                                                                                                                                                                                   |

List of acronyms: HCCD (Hawai‘i County Civil Defense, Emergency Operations Center, Hilo); HVNP (Hawai‘i Volcanoes National Park); MVS (Mountain View Elementary School); OVE (Ocean View Estates subdivision); PTA (U.S. Army Pōhakuloa Training Area, Island of Hawai‘i); UH (University of Hawai‘i, Hilo).

APPENDIX 3. Summary of lava-flow projections based on Volcano Activity Notices issued by the Hawaiian Volcano Observatory, 4 September 2014 to 25 March 2015 (USGS VANs are archived online, [https://volcanoes.usgs.gov/vhp/archive\\_search.html](https://volcanoes.usgs.gov/vhp/archive_search.html)).

| VAN#     | Date, VAN Issued | Time; HST | Flow length, km | Advance rate, m/day | Interval of advance rate | Projection of lava flow location |             |                            |       |                                      |           |             |      |             |       | Conditions                                                                                                             |  |
|----------|------------------|-----------|-----------------|---------------------|--------------------------|----------------------------------|-------------|----------------------------|-------|--------------------------------------|-----------|-------------|------|-------------|-------|------------------------------------------------------------------------------------------------------------------------|--|
|          |                  |           |                 |                     |                          | Kaohe Homesteads boundary        |             | Cemetery Road or Apa‘a St. |       | Pahoa Village Road (government road) |           | Marketplace |      | Highway 130 |       |                                                                                                                        |  |
|          |                  |           |                 |                     |                          |                                  |             |                            |       |                                      |           |             |      |             |       |                                                                                                                        |  |
|          |                  |           |                 |                     |                          | days                             | date        | days                       | date  | days                                 | date      | days        | date | days        | date  |                                                                                                                        |  |
| 2014/H1  | 9/4/2014         | 10:45 AM  | 13.2            | 250                 | 7/10–9/13                | 5-7                              | 9/18–9/20   |                            |       |                                      |           |             |      |             |       | Alert level from WATCH to WARNING; "... within 5-7 days should lava resume advancing within the crack system."         |  |
| 2014/H2  | 9/8/2014         | 5:01 PM   | 13.7            | 400                 | 9/6–9/8                  |                                  |             |                            |       | 16-18                                | 9/24–9/26 |             |      |             |       | "...if lava not further confined within cracks and down-dropped blocks within the ERZ."                                |  |
|          |                  |           |                 |                     |                          | NW edge Kaohe H.                 |             |                            |       |                                      |           |             |      |             |       |                                                                                                                        |  |
| 2014/H3  | 9/10/2014        | 7:21 PM   | 14.5            | 400                 | 9/6–9/10                 | 1.5                              | 9/11 - 9/12 |                            |       | 14–16                                | 9/24–9/26 |             |      |             |       | "...if lava not further confined within cracks and down-dropped blocks within the ERZ."                                |  |
| 2014/H4  | 9/12/2014        | 8:03 PM   | 14.9            | 250                 | 9/10–9/12                | <1                               | 9/13        |                            |       | 20                                   | 9/22      |             |      |             |       | "...if lava not further confined within cracks and down-dropped blocks within the ERZ."                                |  |
| 2014/H5  | 9/15/2014        | 5:15 PM   | 15.5            | 215                 | 9/12–9/15                |                                  |             | 15                         | 9/30  | <20                                  | <10/5     |             |      |             |       | "At the average rate of advancement of 215 m/day..."                                                                   |  |
| 2014/H6  | 9/17/2014        | 5:42 PM   | 16              | 290                 | 9/15–9/17                |                                  |             | 9                          | 9/26  | <13                                  | <9/30     |             |      |             |       | "At the average rate of advancement of 290 m/day..."                                                                   |  |
| 2014/H7  | 9/19/2014        | 3:59 PM   | 16.3            | 190                 | 9/17–9/19                |                                  |             | 13                         | 10/2  | <18                                  | <10/7     |             |      | 21          | 10/10 | "Using the most recent rate of advancement of 190 m/day..."                                                            |  |
| 2014/H8  | 9/24/2014        | 8:39 PM   | 16.4            | 0                   | 9/24                     |                                  |             | none                       |       | none                                 |           |             |      | none        |       |                                                                                                                        |  |
| 2014/H9  | 9/26/2014        | 5:17 PM   |                 | 0                   |                          |                                  |             | none                       |       | none                                 |           |             |      | none        |       |                                                                                                                        |  |
| 2014/H10 | 9/29/2014        | 5:34 PM   |                 | 0                   |                          |                                  |             | none                       |       | none                                 |           |             |      | none        |       | "... nearest lobe is about 125 m behind the stalled flow front;" lobes behind front have moved 65-80 m in past 3 days. |  |
| 2014/H11 | 10/1/2014        | 5:42 PM   | 16.4            | 75                  | 9/29–10/1                |                                  |             | none                       |       | none                                 |           |             |      | none        |       | "... narrow flow front moved about 75 m" in past 2 days.                                                               |  |
| 2014/H12 | 10/3/2014        | 6:08 PM   | 16.7            | 135                 | 10/1–10/3                |                                  |             | none                       |       | none                                 |           |             |      | none        |       |                                                                                                                        |  |
| 2014/H13 | 10/6/2014        | 6:42 PM   | 17              | 120                 | 10/3–10/6                |                                  |             | 16                         | 10/22 |                                      |           |             |      |             |       | The advance rate... "has varied significantly during the past month, meaning this projection is subject to change."    |  |
| 2014/H14 | 10/8/2014        | 6:43 PM   | 17.3            | 120                 | past week                |                                  |             | 14                         | 10/22 |                                      |           |             |      |             |       | Same as H13                                                                                                            |  |
| 2014/H15 | 10/10/2014       | 5:56 PM   | 17.4            | 86                  | 10/3–10/10               |                                  |             | 18                         | 10/28 |                                      |           |             |      |             |       | Same as H13                                                                                                            |  |

|          |                                                                                                                                                                                                            |          |       |     |              |  |  |      |                                  |      |  |   |       |   |       |                                                                                                                                                                                                                              |
|----------|------------------------------------------------------------------------------------------------------------------------------------------------------------------------------------------------------------|----------|-------|-----|--------------|--|--|------|----------------------------------|------|--|---|-------|---|-------|------------------------------------------------------------------------------------------------------------------------------------------------------------------------------------------------------------------------------|
| 2014/H16 | 10/13/2014                                                                                                                                                                                                 | 4:54 PM  | 17.6  | 74  | 10/6–10/13   |  |  | 19   | 11/1                             |      |  |   |       |   |       | Same as H13                                                                                                                                                                                                                  |
| 2014/H17 | 10/15/2014                                                                                                                                                                                                 | 5:28 PM  | 17.6  | 25  | 10/13–10/15  |  |  | none |                                  |      |  |   |       |   |       | Because "...flow has slowed in the past 2 days to about 25 m/day, we do not offer a future projection of the flow's advance."                                                                                                |
| 2014/H18 | 10/17/2014                                                                                                                                                                                                 | 5:42 PM  | 17.6  | 25  | 10/15–10/17  |  |  | none |                                  |      |  |   |       |   |       | Same as H17                                                                                                                                                                                                                  |
| 2014/H19 | 10/20/2014                                                                                                                                                                                                 | 7:45 PM  | 17.6  | 0   | 10/17–10/20  |  |  | none |                                  |      |  |   |       |   |       | Same as H17                                                                                                                                                                                                                  |
|          | On 22 Ocotber, Status Reports were issued after overflights in lieu of VANs when no significant change in flow behavior, except to highlight potential of lava inundation of infrastructure within 7 days. |          |       |     |              |  |  |      |                                  |      |  |   |       |   |       |                                                                                                                                                                                                                              |
| 2014/H20 | 10/25/2014                                                                                                                                                                                                 | 1:40 PM  | ~18.8 | 240 |              |  |  |      | Lava crossed road 10/25, 3:50 AM | none |  |   |       |   | none  | Recent observations: "As shown by the varying advance rates of the past several weeks, the flow's future advance rate is likely to continue fluctuating, making it difficult to forecast arrival times at particular sites." |
| 2014/H21 | 12/16/2014                                                                                                                                                                                                 | 10:06 PM |       | 285 | 12/9 - 12/16 |  |  |      |                                  |      |  | 5 | 12/21 | 5 | 12/21 | "...could reach the marketplace and Highway 130 in about 5 days, warranting this VAN."                                                                                                                                       |
| 2014/H22 | 3/25/2015                                                                                                                                                                                                  | 2:17 PM  |       | 0   |              |  |  |      |                                  |      |  |   |       |   |       | Alert level changed from WARNING to WATCH                                                                                                                                                                                    |
